# Supplementary material for: The molecular diversity of dissolved organic matter in forest streams across central Canadian boreal watersheds
Source: Royal Society of Chemistry journal article supplement (doi:10.1039/d3em00305a), 2024-01-01

## Supporting Information

### **The Molecular Diversity of Dissolved Organic Matter in Forest Streams Across Central Canadian Boreal Watersheds**

Mangal, V<sup>a</sup>., Lam, W.Y<sup>a</sup>., Emilson, J.S.E., Mackereth, R.W., Mitchell, C.P.J.<sup>a\*</sup>.

<sup>a</sup>Department of Physical and Environmental Sciences, University of Toronto Scarborough, 1265  
Military Trail, Toronto, ON, Canada, M1C 1A4.

\*Corresponding author: [vmangal@brocku.ca](mailto:vmangal@brocku.ca)

**Table S1:** Water chemistry variables including pH, electrical conductivity, DO%, water temperature, and DOC concentrations of the 13 sampled locations in the spring of 2019. Landscape classifications are based on pH in the spring.

| Site | Landscape Classification | Collection Date | pH   | Conductivity (uS cm <sup>-1</sup> ) | DO (%) | Water Temperature (°C) | [DOC] (mg L <sup>-1</sup> ) |
|------|--------------------------|-----------------|------|-------------------------------------|--------|------------------------|-----------------------------|
| DWR1 | Peatland/Plain           | 2019-05-30      | 4.40 | 129                                 | 72     | 5.7                    | 14.6±0.02                   |
| CF2  | Sandy Soils              | 2019-06-04      | 5.02 | 13.4                                | 73     | 6.3                    | 13.9±0.06                   |
| CFR1 | Sandy Soils              | 2019-06-11      | 5.44 | 20.2                                | 55     | 3.7                    | 28.6±0.25                   |
| DE3  | Acidic Shallow Soil      | 2019-06-02      | 5.71 | 320                                 | 51     | 10.6                   | 14.2±0.09                   |
| DE2  | Acidic Shallow Soil      | 2019-05-31      | 6.15 | 27                                  | 82     | 13.3                   | 16.4±0.28                   |
| DE1  | Acidic Shallow Soil      | 2019-06-05      | 6.28 | 39.9                                | 77     | 18.1                   | 14.6±0.22                   |
| CF3  | Sandy Soils              | 2019-06-04      | 6.46 | 32.9                                | 91     | 8.4                    | 14.4±0.32                   |
| DER1 | Acidic Shallow Soil      | 2019-06-05      | 6.68 | 45.6                                | 45     | 6.6                    | 10.2±0.09                   |
| CF1  | Sandy Soils              | 2019-06-06      | 6.69 | 67.6                                | 95     | 4.3                    | 18.6±0.18                   |
| SN1  | Neutral Soil             | 2019-06-10      | 6.79 | 66.8                                | 81     | 19.1                   | 6.46±0.09                   |
| SN2U | Neutral Soil             | 2019-06-02      | 6.85 | 188.4                               | 45     | 13.6                   | 5.08±0.28                   |
| SN2  | Neutral Soil             | 2019-05-31      | 6.97 | 217.3                               | 69     | 11.3                   | 7.200.16                    |
| DW1  | Basic Soil               | 2019-06-03      | 7.15 | 75                                  | 84     | 8.3                    | 3.80±4.00x10 <sup>-3</sup>  |

**Table S2:** DOC concentrations and water chemistry variables including pH, conductivity, DO% and water temperature of the 13 sampled locations in the fall of 2019. Landscape classifications are absent for fall sampling as they are based on pH of watersheds in the spring.

| Site | Collection Date | pH   | Conductivity (uS cm <sup>-1</sup> ) | DO (%) | Water Temperature (°C) | [DOC] (mg L <sup>-1</sup> ) |
|------|-----------------|------|-------------------------------------|--------|------------------------|-----------------------------|
| CF1  | 2019-10-14      | 7.03 | 66.8                                | 69     | 5.40                   | 16.9±0.29                   |
| CF2  | 2019-10-10      | 6.54 | 15.1                                | 72     | 8.30                   | 25.6±0.62                   |
| CF3  | 2019-10-10      | 7.50 | 31.8                                | 68     | 8.40                   | 17.0±0.23                   |
| CFR1 | 2019-10-14      | 6.71 | 22.5                                | 60     | 4.80                   | 27.0±0.27                   |
| DE1  | 2019-10-13      | N/A  | N/A                                 | N/A    | N/A                    | 16.2±0.25                   |
| DE2  | 2019-10-16      | 7.12 | 25.3                                | 67     | 5.80                   | 25.1±0.31                   |
| DE3  | 2019-10-12      | 7.76 | 28                                  | 61     | 6.60                   | 24.1±0.27                   |
| DER1 | 2019-09-26      | 7.86 | 42.1                                | 60     | 5.90                   | 29.8±0.27                   |
| DW1  | 2019-10-15      | 6.91 | 10.8                                | 65     | 5.80                   | 6.73±0.39                   |
| DWR1 | 2019-10-15      | 6.67 | 16.6                                | 52     | 6.30                   | 23.7±0.27                   |
| SN1  | 2019-10-12      | 7.44 | 43.9                                | 86     | 9.00                   | 15.3±0.12                   |
| SN2  | 2019-10-11      | 7.29 | 157                                 | 47     | 10.8                   | 7.58±1.96                   |
| SN2U | 2019-10-11      | 7.11 | 0.8                                 | 75     | 12.0                   | 7.58±0.14                   |

**Table S3:** Optical properties of the 14 sampled locations during Spring 2019.

| Site | Collection Date | a254nm                 | a300nm | E2:E3 Ratio | S275-295nm | S350-400nm | Slope Ratio |
|------|-----------------|------------------------|--------|-------------|------------|------------|-------------|
| CF1  | 06-Jun          | 51.8                   | 33.3   | 4.73        | 0.01       | 0.02       | 0.82        |
| CF2  | 04-Jun          | 1.65 x 10 <sup>2</sup> | 65.3   | 4.40        | 0.01       | 0.02       | 0.72        |
| CF3  | 04-Jun          | 94.7                   | 57.0   | 4.41        | 0.01       | 0.02       | 0.72        |
| CFR1 | 11-Jun          | 1.04 x 10 <sup>2</sup> | 59.6   | 5.01        | 0.01       | 0.02       | 0.73        |
| DE1  | 05-Jun          | 50.3                   | 30.3   | 4.12        | 0.01       | 0.01       | 0.84        |
| DE2  | 31-May          | 92.5                   | 58.3   | 4.70        | 0.01       | 0.02       | 0.79        |
| DE3  | 02-Jun          | 87.3                   | 52.4   | 4.98        | 0.01       | 0.02       | 0.77        |
| DER1 | 05-Jun          | 50.5                   | 27.9   | 5.30        | 0.01       | 0.02       | 0.81        |
| DW1  | 03-Jun          | 28.5                   | 15.2   | 5.79        | 0.02       | 0.02       | 0.86        |
| DWR1 | 30-May          | 77.6                   | 48.2   | 3.97        | 0.01       | 0.02       | 0.75        |
| SN1  | 10-Jun          | 62.1                   | 36.9   | 4.79        | 0.01       | 0.02       | 0.94        |
| SN2  | 31-May          | 30.8                   | 16.3   | 6.08        | 0.02       | 0.02       | 0.78        |
| SN2U | 02-Jun          | 39.7                   | 20.9   | 5.84        | 0.02       | 0.02       | 0.86        |

**Table S4: Optical properties of the 14 sampled locations during Fall 2019.**

| Site | Collection Date | a254nm                 | a300nm | E2:E3 Ratio | S275-295nm | S350-400nm | Slope Ratio |
|------|-----------------|------------------------|--------|-------------|------------|------------|-------------|
| CF1  | 14-Oct          | 77.0                   | 44.49  | 4.87        | 0.01       | 0.02       | 0.74        |
| CF2  | 10-Oct          | 1.27 x 10 <sup>2</sup> | 75.95  | 4.49        | 0.01       | 0.02       | 0.71        |
| CF3  | 10-Oct          | 1.02 x 10 <sup>2</sup> | 61.18  | 4.43        | 0.01       | 0.02       | 0.70        |
| CFR1 | 14-Oct          | 1.41 x 10 <sup>2</sup> | 82.99  | 4.73        | 0.01       | 0.02       | 0.71        |
| DE1  | 13-Oct          | 50.8                   | 28.02  | 5.41        | 0.01       | 0.02       | 0.78        |
| DE2  | 16-Oct          | 1.20 x 10 <sup>2</sup> | 71.09  | 4.63        | 0.01       | 0.02       | 0.72        |
| DE3  | 12-Oct          | 1.21 x 10 <sup>2</sup> | 70.17  | 4.91        | 0.01       | 0.02       | 0.72        |
| DER1 | 07-Oct          | 1.36 x 10 <sup>2</sup> | 79.45  | 4.84        | 0.01       | 0.02       | 0.72        |
| DW1  | 15-Oct          | 38.0                   | 20.75  | 5.57        | 0.01       | 0.02       | 0.78        |
| DWR1 | 15-Oct          | 1.50 x 10 <sup>2</sup> | 91.32  | 4.40        | 0.01       | 0.02       | 0.68        |
| SN1  | 12-Oct          | 77.2                   | 43.05  | 5.27        | 0.01       | 0.02       | 0.78        |
| SN2  | 11-Oct          | 46.6                   | 25.44  | 5.81        | 0.01       | 0.02       | 0.73        |
| SN2U | 11-Oct          | 49.3                   | 27.13  | 5.55        | 0.01       | 0.02       | 0.75        |

**Table S5:** Intensity weighted average bulk FT-ICR-MS molecular properties including  $m/z$ , atomic ratios, elemental percentage contributions, aromaticity proxies and oxidation states of carbon during spring collections.

| Site | Collection Date | $m/z_{wa}$ | $O/C_{wa}$ | $H/C_{wa}$ | $N/C_{wa}$            | $S/C_{wa}$            | $\%C_{wa}$ | $\%H_{wa}$ | $\%O_{wa}$ | $\%N_{wa}$ | $\%S_{wa}$ | $DBE_{wa}$ | $DBE-O_{wa}$ | $AI_{wa}$ | $AI_{mod_{wa}}$ | $NOSC_{wa}$ |
|------|-----------------|------------|------------|------------|-----------------------|-----------------------|------------|------------|------------|------------|------------|------------|--------------|-----------|-----------------|-------------|
| CF1  | 2019-06-06      | 493.894    | 0.49       | 1.36       | $2.57 \times 10^{-2}$ | $2.37 \times 10^{-2}$ | 54.4       | 6.26       | 34.6       | 1.51       | 3.22       | 7.68       | -2.63        | -0.50     | 0.25            | -0.30       |
| CF2  | 2019-06-04      | 500.822    | 0.45       | 1.28       | $2.88 \times 10^{-2}$ | $2.86 \times 10^{-2}$ | 54.7       | 5.88       | 33.6       | 1.75       | 4.10       | 8.01       | -1.36        | -0.36     | 0.35            | -0.25       |
| CF3  | 2019-06-04      | 466.152    | 0.46       | 1.20       | $2.60 \times 10^{-2}$ | $2.19 \times 10^{-2}$ | 56.6       | 5.73       | 32.8       | 1.67       | 3.24       | 9.64       | 0.70         | -0.43     | 0.37            | -0.21       |
| CFR1 | 2019-06-11      | 308.660    | 0.48       | 1.15       | $5.44 \times 10^{-3}$ | $2.55 \times 10^{-3}$ | 58.3       | 5.75       | 35.2       | 0.36       | 0.36       | 7.31       | 0.45         | -0.07     | 0.65            | -0.18       |
| DE1  | 2019-06-05      | 321.410    | 0.51       | 1.10       | $6.04 \times 10^{-3}$ | $2.49 \times 10^{-3}$ | 57.0       | 5.37       | 36.9       | 0.37       | 0.31       | 7.84       | 0.33         | -0.12     | 0.67            | -0.07       |
| DE2  | 2019-05-31      | 339.773    | 0.50       | 1.14       | $7.55 \times 10^{-3}$ | $5.58 \times 10^{-3}$ | 57.0       | 5.58       | 36.3       | 0.43       | 0.69       | 7.95       | 0.14         | -0.17     | 0.63            | -0.12       |
| DE3  | 2019-06-02      | 316.206    | 0.50       | 1.13       | $7.03 \times 10^{-3}$ | $2.99 \times 10^{-3}$ | 57.3       | 5.55       | 36.4       | 0.43       | 0.33       | 7.47       | 0.18         | -0.17     | 0.63            | -0.11       |
| DER1 | 2019-06-05      | 323.137    | 0.47       | 1.11       | $4.69 \times 10^{-3}$ | $1.91 \times 10^{-2}$ | 57.3       | 5.44       | 34.0       | 0.30       | 2.99       | 7.81       | 0.92         | -0.12     | 0.62            | -0.16       |
| DW1  | 2019-06-03      | 366.160    | 0.48       | 1.13       | $1.19 \times 10^{-2}$ | $2.63 \times 10^{-2}$ | 55.8       | 5.37       | 34.3       | 0.74       | 3.77       | 8.46       | 0.60         | -0.25     | 0.51            | -0.14       |
| DWR1 | 2019-05-30      | 293.105    | 0.37       | 1.24       | $3.26 \times 10^{-2}$ | $2.24 \times 10^{-2}$ | 60.1       | 6.30       | 27.8       | 2.31       | 3.55       | 6.70       | 1.74         | 0.07      | 0.44            | -0.44       |
| SN1  | 2019-06-10      | 285.579    | 0.52       | 1.10       | $4.10 \times 10^{-3}$ | $1.13 \times 10^{-3}$ | 56.7       | 5.28       | 37.6       | 0.22       | 0.14       | 6.18       | 0.31         | -0.08     | 0.66            | -0.06       |
| SN2  | 2019-05-31      | 297.367    | 0.38       | 1.28       | $1.65 \times 10^{-3}$ | $1.04 \times 10^{-2}$ | 61.5       | 6.67       | 30.2       | 0.07       | 1.61       | 6.40       | 0.78         | 0.05      | 0.41            | -0.52       |
| SN2U | 2019-06-02      | 294.240    | 0.44       | 1.27       | $1.66 \times 10^{-2}$ | $3.98 \times 10^{-3}$ | 58.4       | 6.22       | 33.7       | 1.03       | 0.65       | 6.11       | -0.03        | -0.07     | 0.43            | -0.33       |

**Table S6:** Intensity weighted average bulk FT-ICR-MS molecular properties including  $m/z$ , atomic ratios, elemental percentage contributions, aromaticity proxies and oxidation states of carbon during fall collections.

| Site | Collection Date | $m/z_{wa}$ | O/C <sub>wa</sub> | H/C <sub>wa</sub> | N/C <sub>wa</sub>      | S/C <sub>wa</sub>      | %C <sub>wa</sub> | %H <sub>wa</sub> | %O <sub>wa</sub> | %N <sub>wa</sub> | %S <sub>wa</sub> | DBE <sub>wa</sub> | DBE-O <sub>wa</sub> | AI <sub>wa</sub>        | AImod <sub>wa</sub> | NOSC <sub>wa</sub> |
|------|-----------------|------------|-------------------|-------------------|------------------------|------------------------|------------------|------------------|------------------|------------------|------------------|-------------------|---------------------|-------------------------|---------------------|--------------------|
| CF1  | 2019-10-14      | 308.290    | 0.45              | 1.15              | 1.54 x10 <sup>-2</sup> | 8.84 x10 <sup>-3</sup> | 58.2             | 5.66             | 33.7             | 0.99             | 1.44             | 7.39              | 0.88                | 5.47 x10 <sup>-2</sup>  | 0.57                | -0.21              |
| CF2  | 2019-10-10      | 344.468    | 0.44              | 1.09              | 1.78 x10 <sup>-2</sup> | 1.63 x10 <sup>-2</sup> | 58.0             | 5.39             | 32.8             | 1.20             | 2.56             | 8.53              | 1.52                | 7.15 x10 <sup>-2</sup>  | 0.62                | -0.16              |
| CF3  | 2019-10-10      | 333.148    | 0.46              | 1.10              | 1.59 x10 <sup>-3</sup> | 1.36 x10 <sup>-2</sup> | 57.5             | 5.40             | 34.8             | 0.11             | 2.22             | 8.03              | 0.79                | 3.77 x10 <sup>-2</sup>  | 0.56                | -0.18              |
| CFR1 | 2019-10-14      | 314.360    | 0.44              | 1.16              | 1.50 x10 <sup>-2</sup> | 1.65 x10 <sup>-2</sup> | 58.0             | 5.72             | 32.7             | 1.00             | 2.62             | 7.25              | 0.89                | 3.16 x10 <sup>-2</sup>  | 0.55                | -0.25              |
| DE1  | 2019-10-13      | 302.807    | 0.42              | 1.29              | 1.35 x10 <sup>-2</sup> | 9.03 x10 <sup>-3</sup> | 58.9             | 6.41             | 32.3             | 0.85             | 1.42             | 6.20              | 0.11                | -5.72 x10 <sup>-2</sup> | 0.40                | -0.41              |
| DE2  | 2019-10-16      | 304.098    | 0.44              | 1.16              | 1.50 x10 <sup>-2</sup> | 1.65 x10 <sup>-2</sup> | 58.0             | 5.72             | 32.7             | 1.00             | 2.62             | 7.25              | 0.89                | 3.16 x10 <sup>-2</sup>  | 0.56                | -0.25              |
| DE3  | 2019-10-12      | 308.329    | 0.43              | 1.21              | 1.65 x10 <sup>-3</sup> | 9.06 x10 <sup>-3</sup> | 59.3             | 6.05             | 33.2             | 0.10             | 1.42             | 6.94              | 0.53                | -3.18 x10 <sup>-3</sup> | 0.47                | -0.34              |
| DER1 | 2019-10-07      | 295.689    | 0.36              | 1.19              | 2.52 x10 <sup>-2</sup> | 3.03 x10 <sup>-2</sup> | 59.8             | 6.00             | 27.5             | 1.85             | 4.86             | 7.17              | 2.21                | 1.29 x10 <sup>-1</sup>  | 0.51                | -0.40              |
| DW1  | 2019-10-15      | 303.818    | 0.40              | 1.22              | 4.13 x10 <sup>-4</sup> | 1.43 x10 <sup>-2</sup> | 59.9             | 6.19             | 31.5             | 0.03             | 2.29             | 6.82              | 0.83                | 5.45 x10 <sup>-2</sup>  | 0.45                | -0.41              |
| DWR1 | 2019-10-15      | 295.144    | 0.41              | 1.19              | 3.77 x10 <sup>-3</sup> | 1.89 x10 <sup>-2</sup> | 59.3             | 5.99             | 31.4             | 0.28             | 3.05             | 6.82              | 1.04                | 5.31 x10 <sup>-2</sup>  | 0.49                | -0.37              |
| SN1  | 2019-10-12      | 302.365    | 0.42              | 1.20              | 1.32 x10 <sup>-3</sup> | 6.79 x10 <sup>-3</sup> | 60.1             | 6.11             | 32.6             | 0.10             | 1.11             | 7.02              | 0.84                | 7.17 x10 <sup>-2</sup>  | 0.49                | -0.36              |
| SN2  | 2019-10-11      | 329.806    | 0.38              | 1.24              | 5.85 x10 <sup>-3</sup> | 1.54 x10 <sup>-3</sup> | 60.9             | 6.37             | 29.9             | 0.35             | 2.40             | 7.61              | 1.50                | 5.50 x10 <sup>-2</sup>  | 0.45                | -0.46              |
| SN2U | 2019-10-11      | 293.320    | 0.42              | 1.18              | 3.37 x10 <sup>-4</sup> | 7.35 x10 <sup>-2</sup> | 59.8             | 5.98             | 33.0             | 0.02             | 1.17             | 6.93              | 0.87                | 6.29 x10 <sup>-2</sup>  | 0.49                | -0.34              |

**Figure S1:** Total precipitation data (obtained from Environment Canada) for the Dryden area for May (A), June (B) and October (C) 2019.

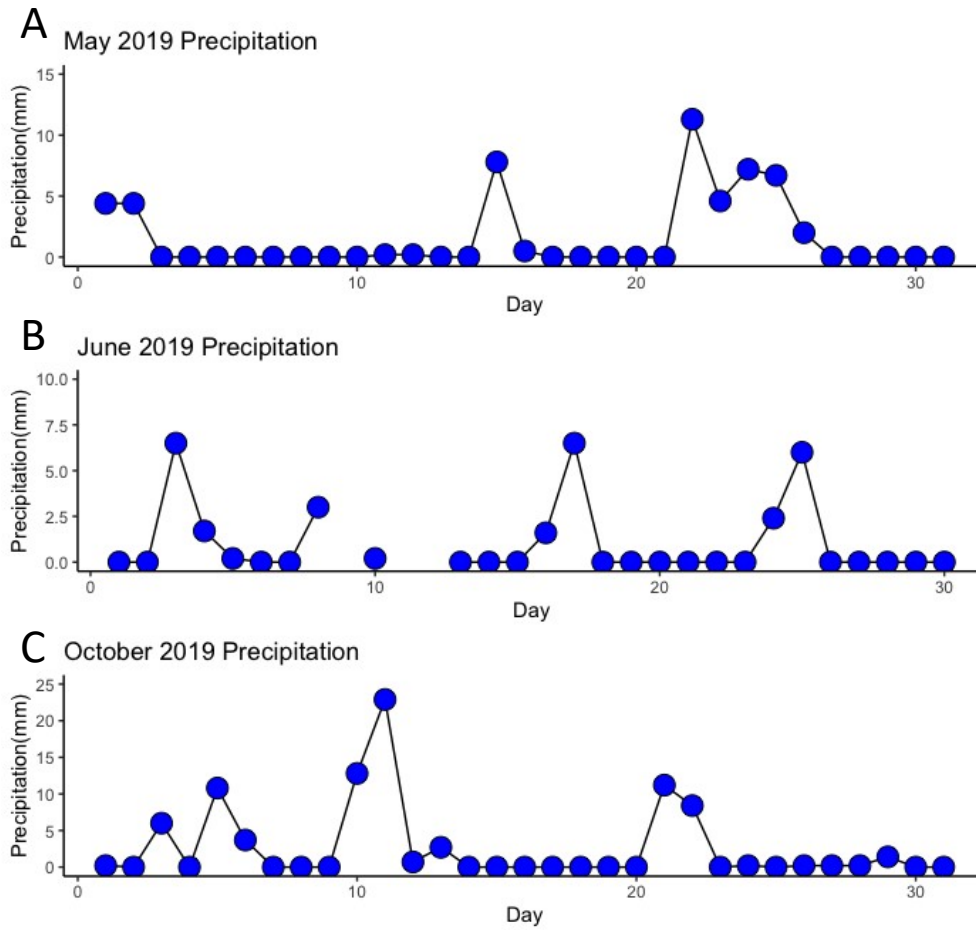



**Figure S2:** Air temperature data (obtained from Environment Canada) for the Dryden area for May (A), June (B) and October (C) 2019.

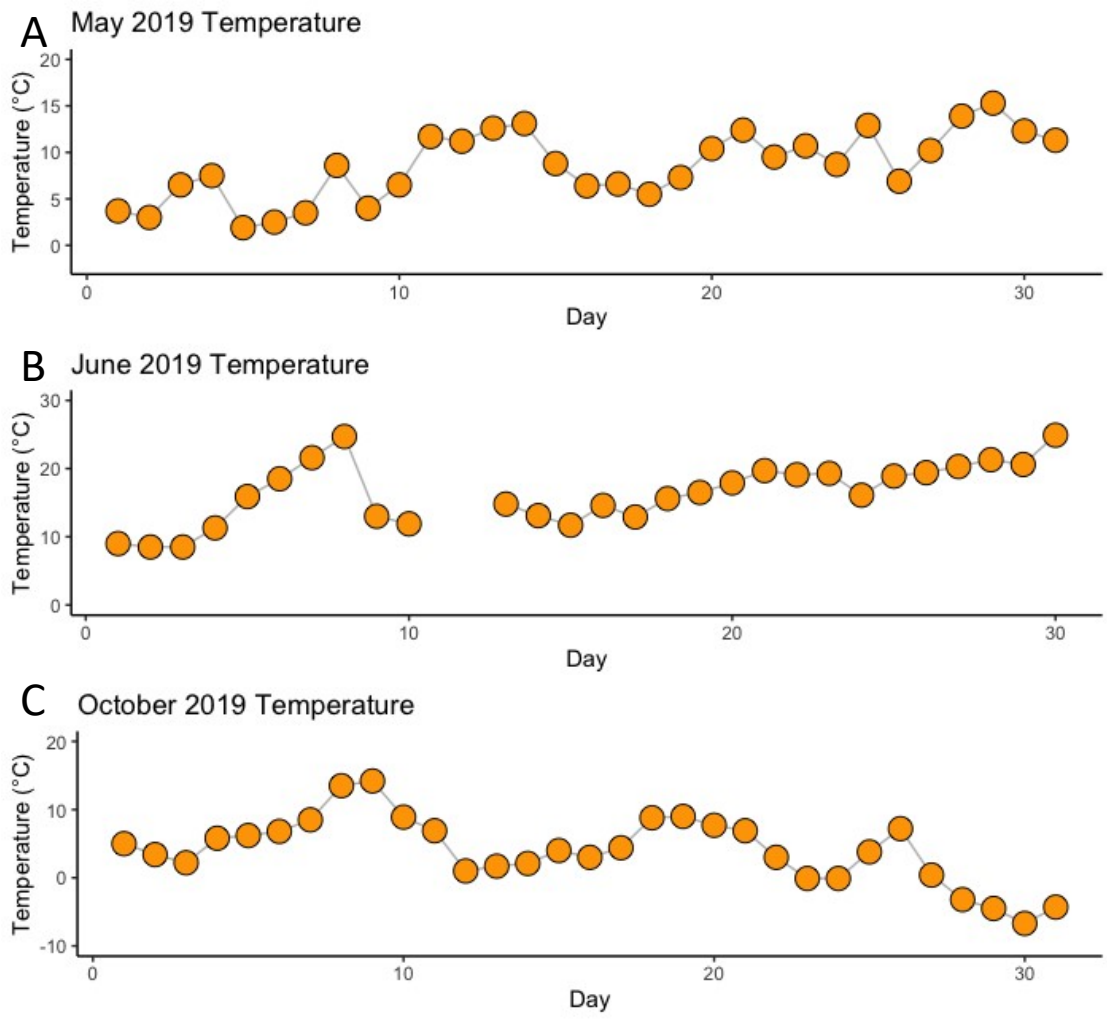

**Figure S3:** FT-ICR-MS spectra of center fire sandy soil sites CF1 (A, E), CF2 (B, F), CF3 (C, G) and CFR1 (D, H) collected during spring (A-D) and fall (E-H).

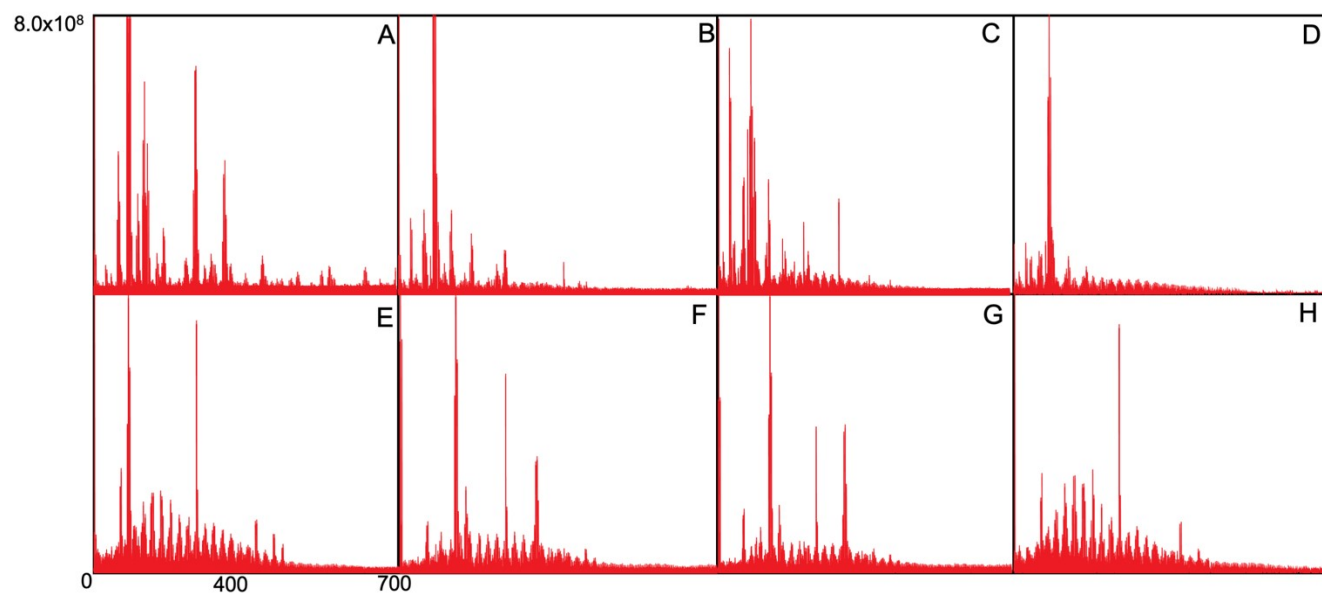

**Figure S4:** FT-ICR-MS spectra of acidic shallow soil site Deserre DE1 (A, E), DE2 (B, F), DE3 (C, G) and DER1 (D, H) collected during spring (A-D) and fall (E-H).

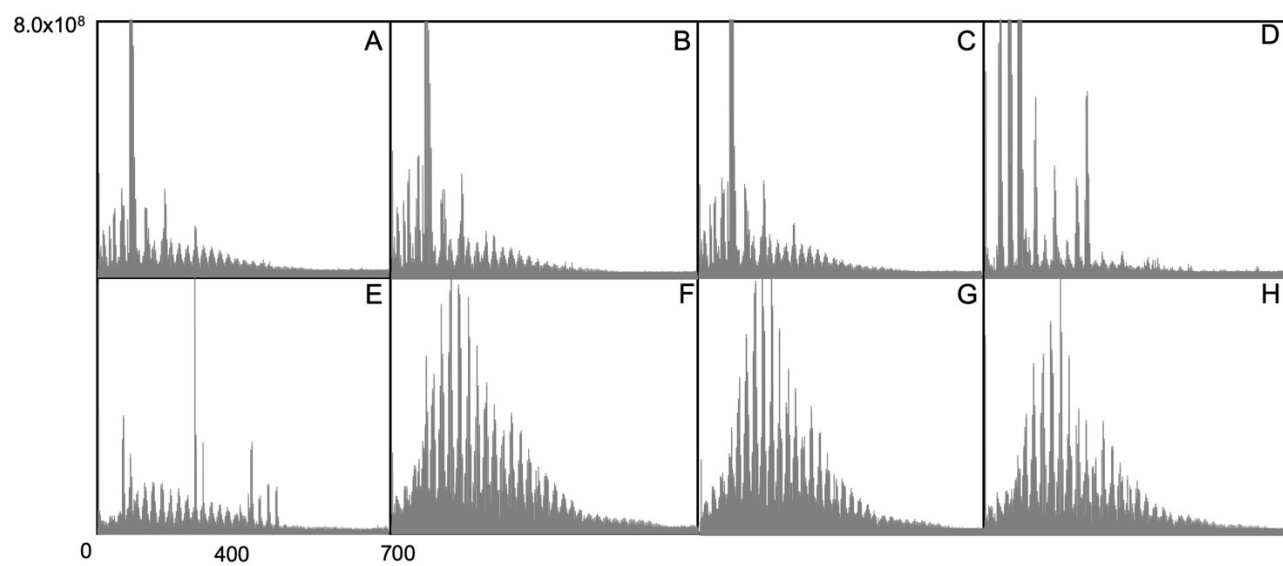

**Figure S5:** FT-ICR-MS spectra of basic shallow soil Dinorwic site DW1 (A, C), and peatland/plain site DWR1 (B, D), during spring (A, B) and fall (C, D).

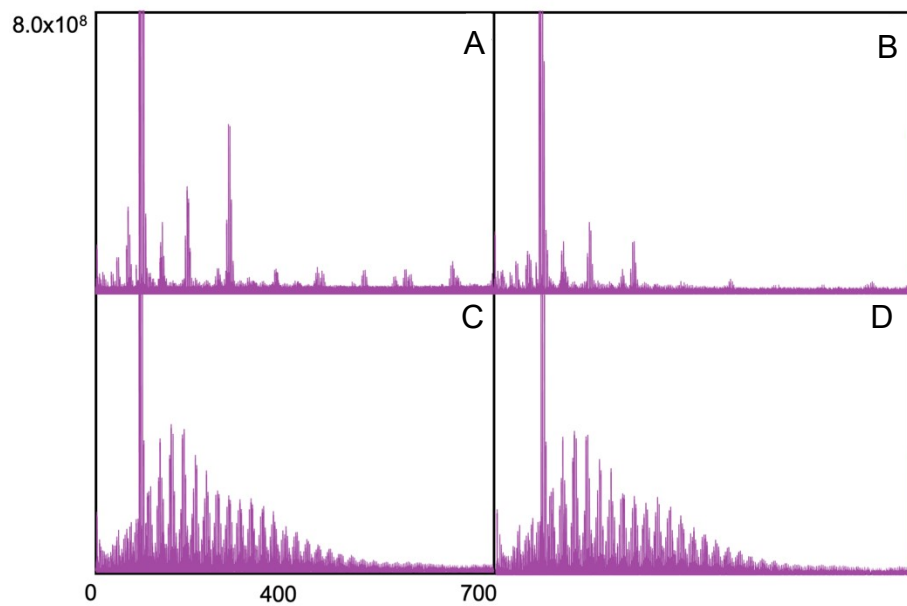

**Figure S6:** FT-ICR-MS spectra of Snowfall mixed sites SN1 (A, E), SN2 (B, F), SN2U (C, G) and collected during spring (A-C) and fall (E-G).

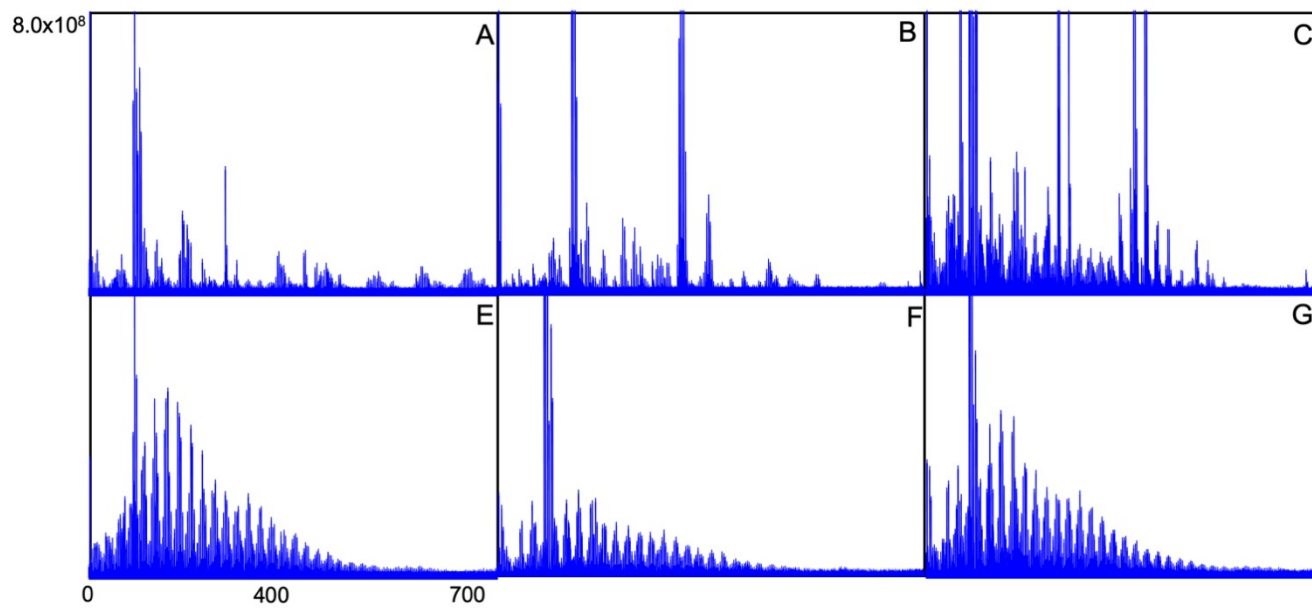

**Figure S7:** Observed (A) and theoretical (B) observations of  $^{13}\text{C}$  and  $^{18}\text{O}$  isotopes that reinforce accurate formula assignment of spectra.

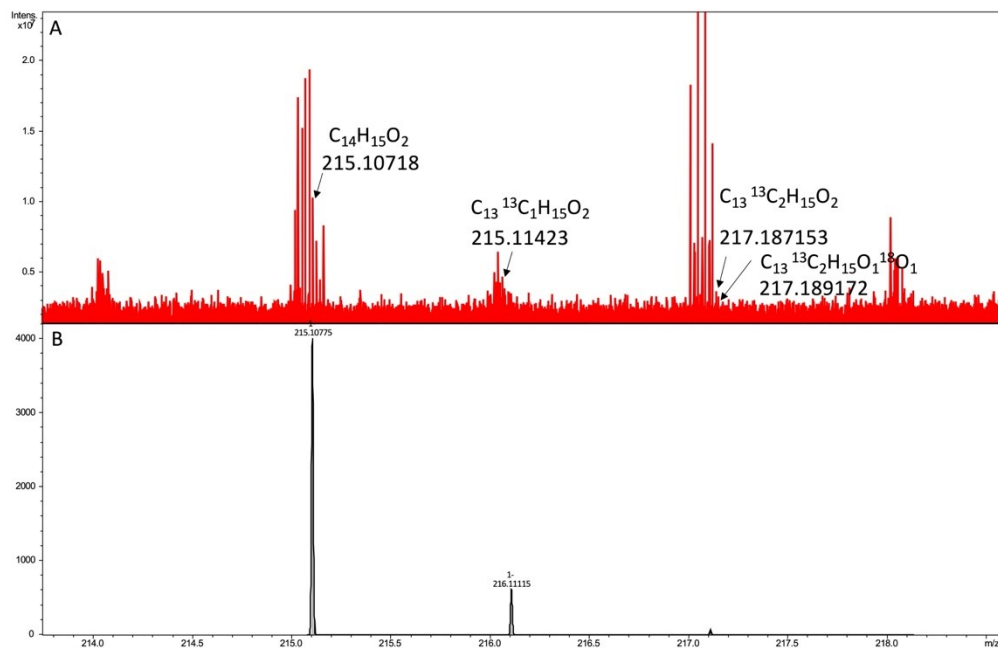

**Figure S8:** Mean DOC concentrations (A) and mean monthly runoff(B) for each boreal watershed sampled in late spring (May/June; blue) and fall (October; orange) in 2019. Error bars represent standard errors based on triplicate measurements across watersheds. Dashed lines in the DOC concentration graph separate watersheds of a similar landscape classification. Precipitation during the sampling period in the late spring and fall were 47 mm and 82 mm, respectively, with a 23 mm rainfall event on October 11th, 2019.

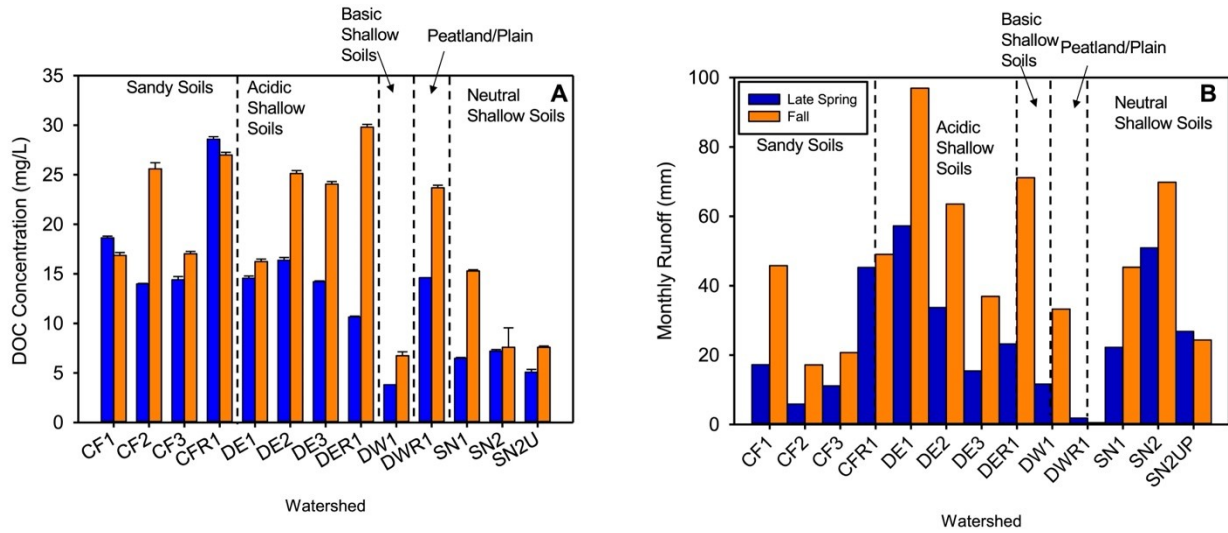

**Figure S9:** Monthly mean runoff calculated by dividing stream discharge by watershed area during the fall (blue) and spring (orange).

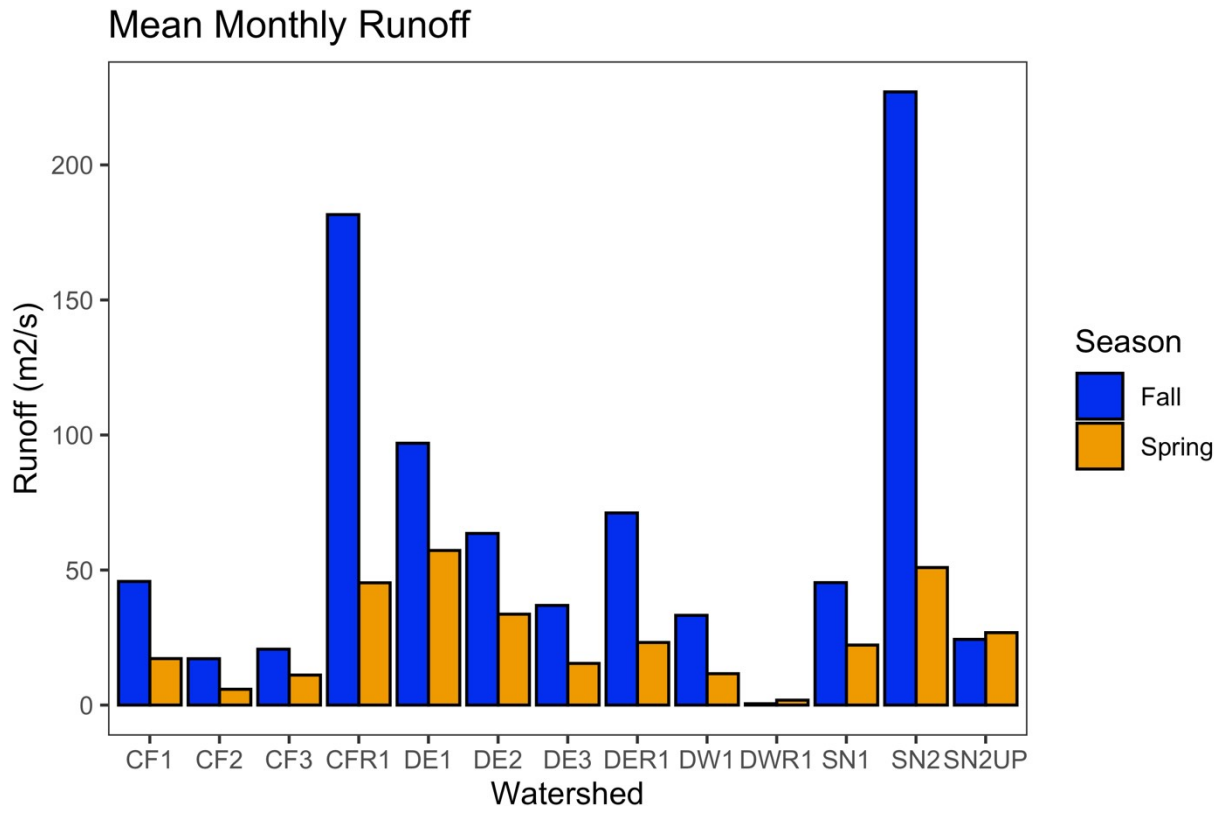



**Figure S10:** Van Krevelen diagram (A) of all molecules found in the spring (blue) and fall (orange), along with a pie chart highlighting up to 86 % of common molecules found across both seasons, but 14 % unique compounds found in the spring.

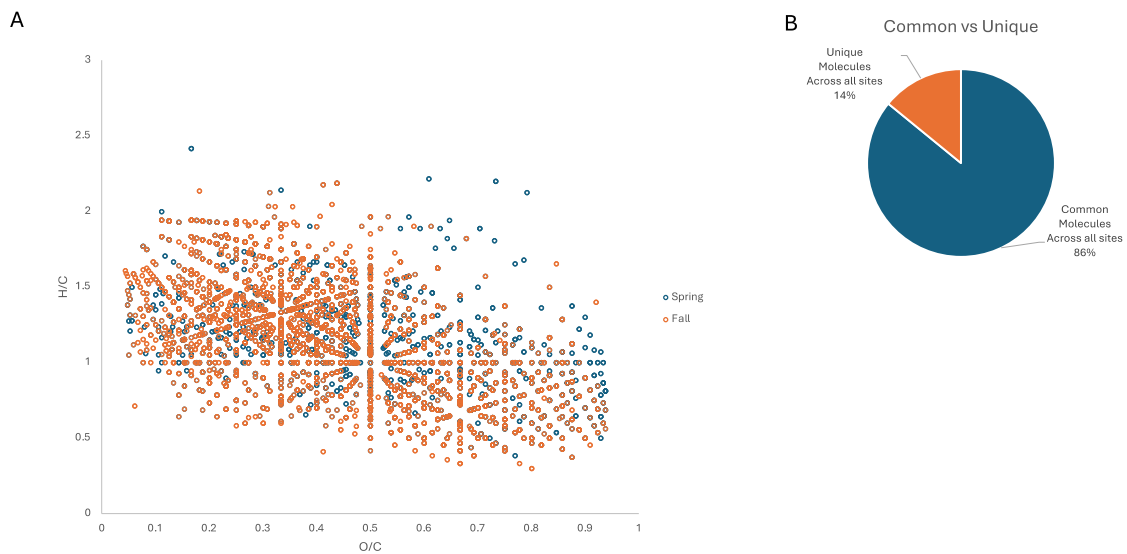

**Figure S11:** Spearman rank correlation of DOM molecules significantly ( $p < 0.05$ ) correlating with wet forest coverage % (A), dry forest coverage % (B), and mixed forest coverage % (C). Molecules positively correlating with each landscape characteristic are found in green whereas molecules negatively correlating with the respective landscape characteristic is found in purple.

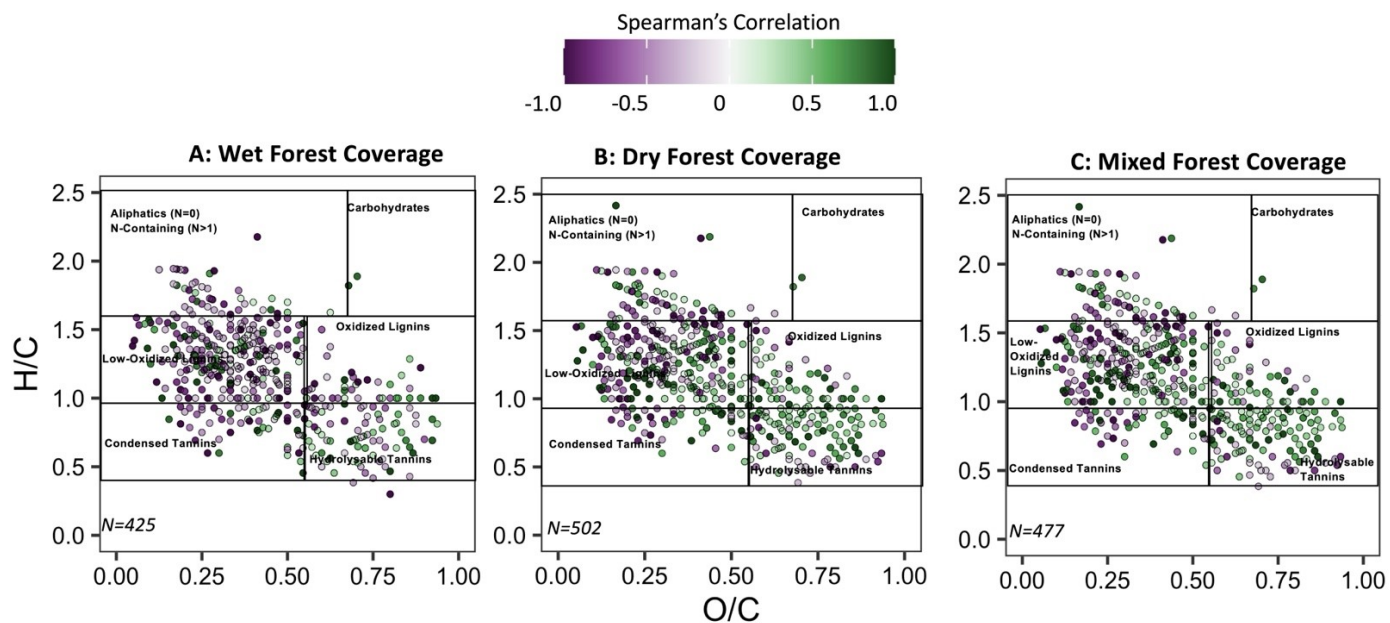

Supplement: d3em00305a1.pdf [file d3em00305a1.pdf]
